# Supplementary material for: Identification of Bacterial Community Composition in Freshwater Aquaculture System Farming of Litopenaeus vannamei Reveals Distinct Temperature-Driven Patterns
Source: Int J Mol Sci. 2014 Aug 7;15(8):13663–80. doi: 10.3390/ijms150813663 (PMC4159818; doi:10.3390/ijms150813663)
Supplement: Supplementary File 1 [file ijms-15-13663-s001.pdf]

## Supplementary Information

**Figure S1.** Rarefaction analysis of the 454-pyrosequencing data retrieved from the WHT and WLT samples in the FASFL. The operational taxonomic units (OTUs) were analyzed at 0.20, 0.05 and 0.03 phylogenetic distances, respectively.

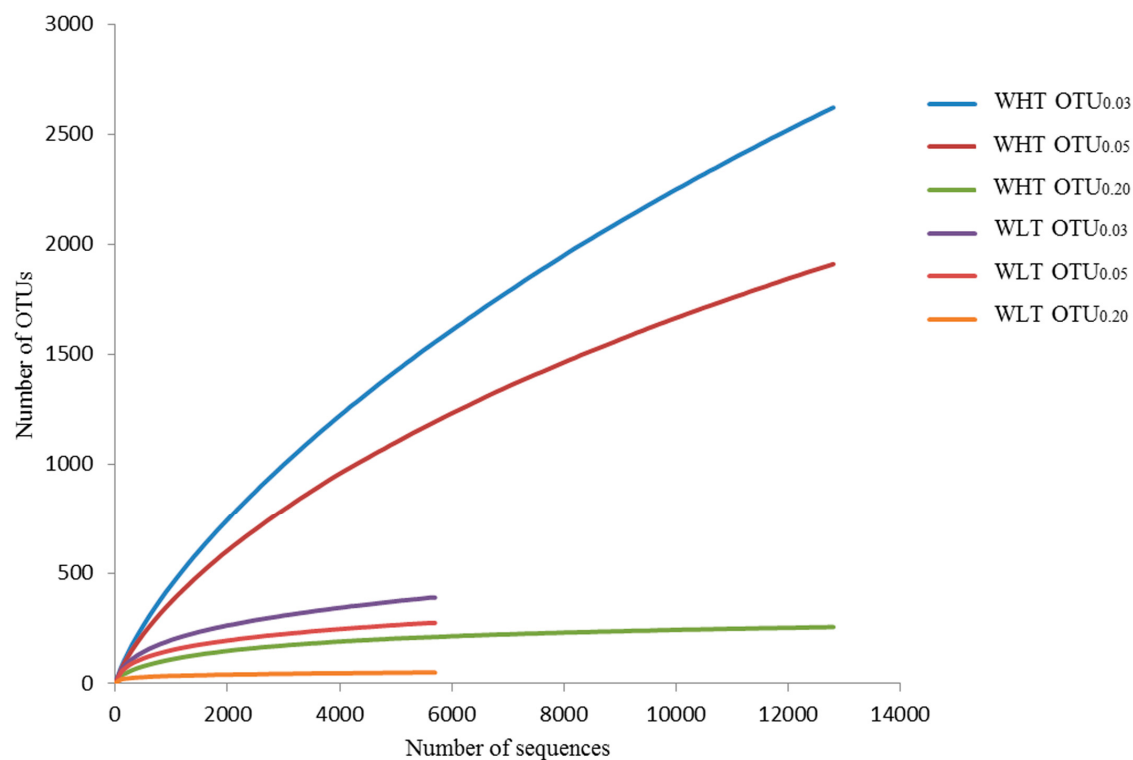

**Table S1.** Richness and diversity of bacterial communities derived from the WHT and WLT samples in the FASFL.

| Sample | Cutoff | OTUs | Chao1 | Shannon Index | Good's Coverage |
|--------|--------|------|-------|---------------|-----------------|
| WHT    | 0.03   | 2562 | 5,229 | 5.79          | 0.879           |
|        | 0.05   | 1892 | 3473  | 5.44          | 0.920           |
|        | 0.20   | 256  | 297   | 3.45          | 0.996           |
| WLT    | 0.03   | 406  | 646   | 4.64          | 0.972           |
|        | 0.05   | 301  | 402   | 4.34          | 0.983           |
|        | 0.20   | 49   | 58    | 2.39          | 0.998           |
